# Supplementary material for: Increased glomerular filtration rate and impaired contractile function of mesangial cells in TRPC6 knockout mice
Source: PubMed Central journal article supplement (PMC5482875; doi:10.1038/s41598-017-04067-z), 2017-06-23
Supplement: 41598_2017_4067_MOESM1_ESM.pdf [file 41598_2017_4067_MOESM1_ESM.pdf]

## Supplementary Information

### INCREASED GLOMERULAR FILTRATION RATE AND IMPAIRED CONTRACTILE FUNCTION OF MESANGIAL CELLS IN TRPC6 KNOCKOUT MICE

Weizu Li<sup>2</sup>, Yanfeng Ding<sup>1</sup>, Crystal Smedley<sup>1</sup>, Yanxia Wang<sup>1</sup>, Sarika Chaudhari<sup>1</sup>,  
Lutz Birnbaumer<sup>3</sup> and Rong Ma<sup>1\*</sup>

**Fig. 1S**

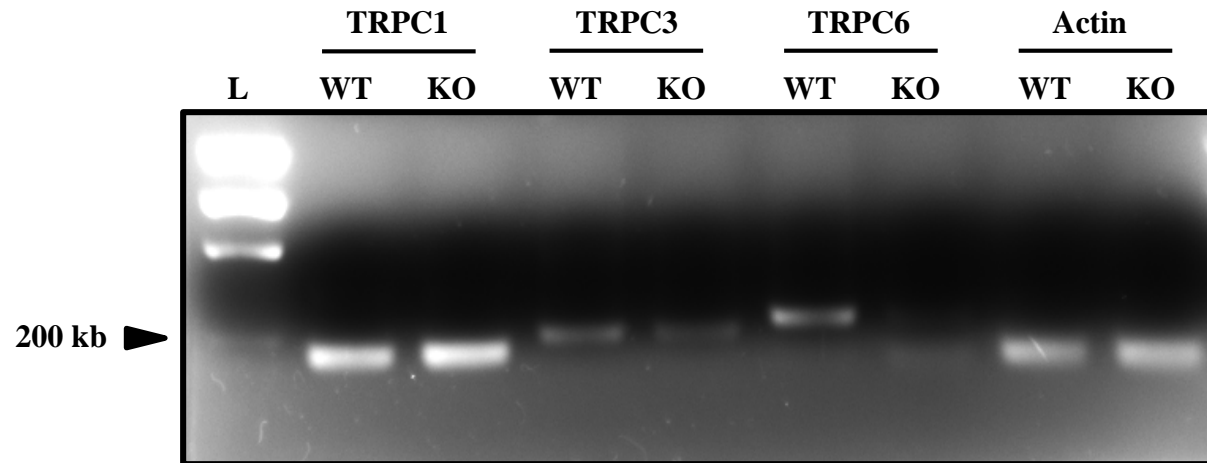

## FIGURE LEGENDS

**Fig. 1S** A representative original and full-length gel, showing mRNA bands of TRPC1, TRPC3, and TRPC6 in the renal cortex of WT and KO mice. Actin was used as a control.
